# Supplementary material for: Chlorine-rich lithium argyrodite enables stable interfacial Li plating/stripping behavior in anode-free all-solid-state batteries
Source: Royal Society of Chemistry journal article supplement (doi:10.1039/d3ce00560g), 2023-01-01
Supplement: d3ce00560g1.pdf [file d3ce00560g1.pdf]

# Chlorine-rich lithium argyrodite enables stable interfacial Li plating/stripping behavior in anode- free all-solid-state batteries

*Donghee Gu<sup>a,b</sup>, Hyoungchul Kim<sup>a</sup>, Byung-Kook Kim<sup>a</sup>, Jong-Ho Lee<sup>a,c\*</sup>, and Sangbaek Park<sup>d,\*</sup>*

*<sup>a</sup>Energy Materials Research Center, Korea Institute of Science and Technology (KIST), Seoul, 02792, Republic of Korea*

*<sup>b</sup>School of Civil, Environmental and Architectural Engineering, Korea University, Seoul 02841, South Korea*

*<sup>c</sup>Division of Nanoscience and Technology, University of Science and Technology (UST), Seoul, 02792, Republic of Korea*

*<sup>d</sup>Department of Materials Science and Engineering, Chungnam National University, Daejeon, 34134, Republic of Korea*

\*Corresponding author.

Tel.: +82 2 958 5529; fax: +82 2 985 5544.

*E-mail address:* [jongho@kist.re.kr](mailto:jongho@kist.re.kr) (J. Lee)

Tel.: +82 42 821 6639; fax: +82 42 822 5850.

*E-mail address:* [sb.park@cnu.ac.kr](mailto:sb.park@cnu.ac.kr) (S. Park)

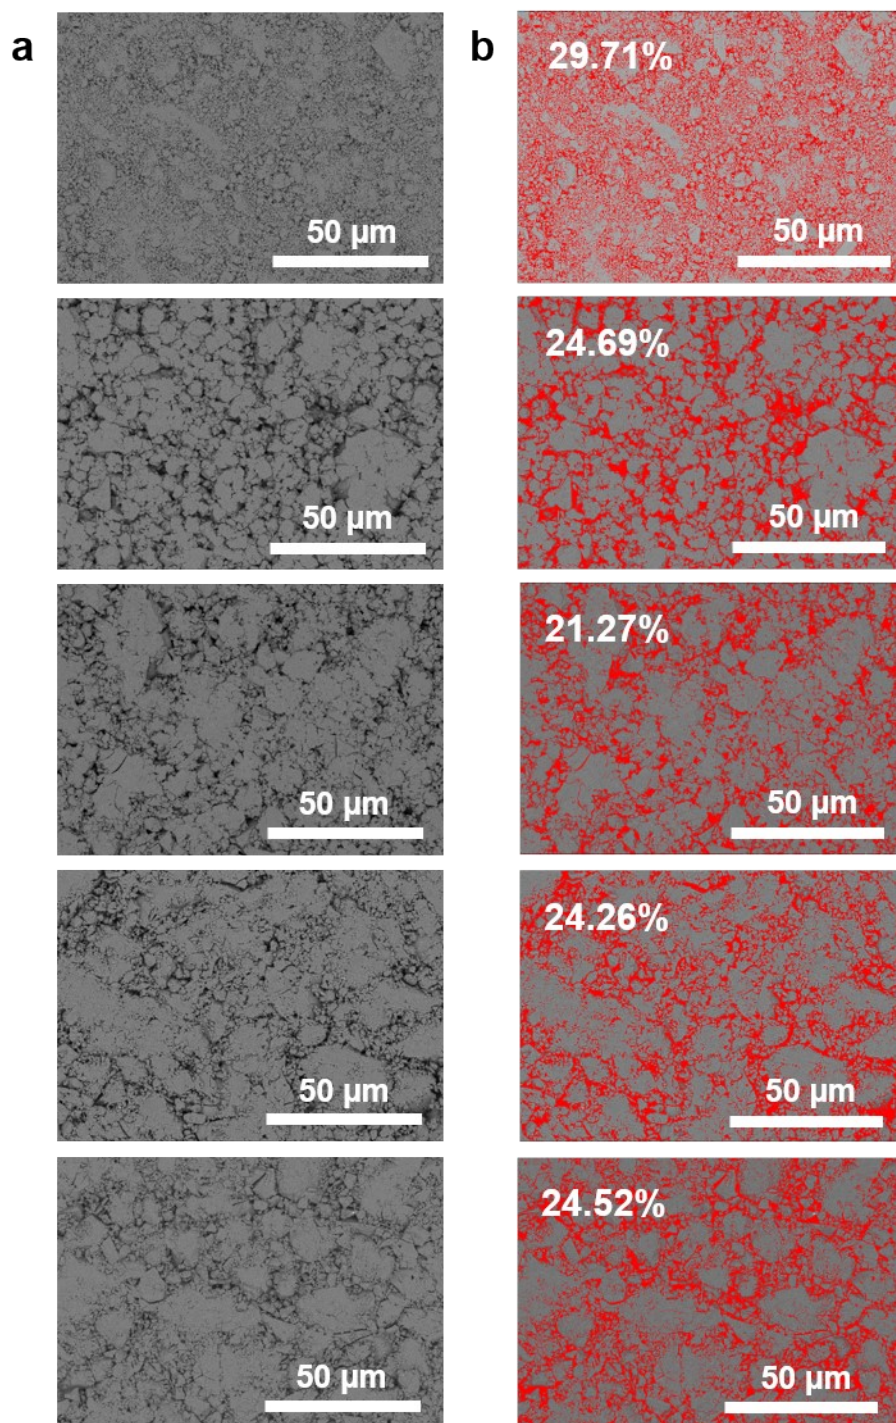

**Fig. S1.** Porosity analysis of SE pellets. (a) BSE images and (b) the corresponding porosity calculation of the surface for compressed SE pellets with  $\text{Li}_3\text{YCl}_6$ ,  $\text{Li}_3\text{PS}_4$ ,  $(\text{Li}_3\text{PS}_4)_{0.7}(\text{LiI})_{0.3}$ ,  $\text{Li}_6\text{PS}_5\text{Cl}$ , and  $\text{Li}_{5.5}\text{PS}_{4.5}\text{Cl}_{1.5}$  in order from top to bottom.

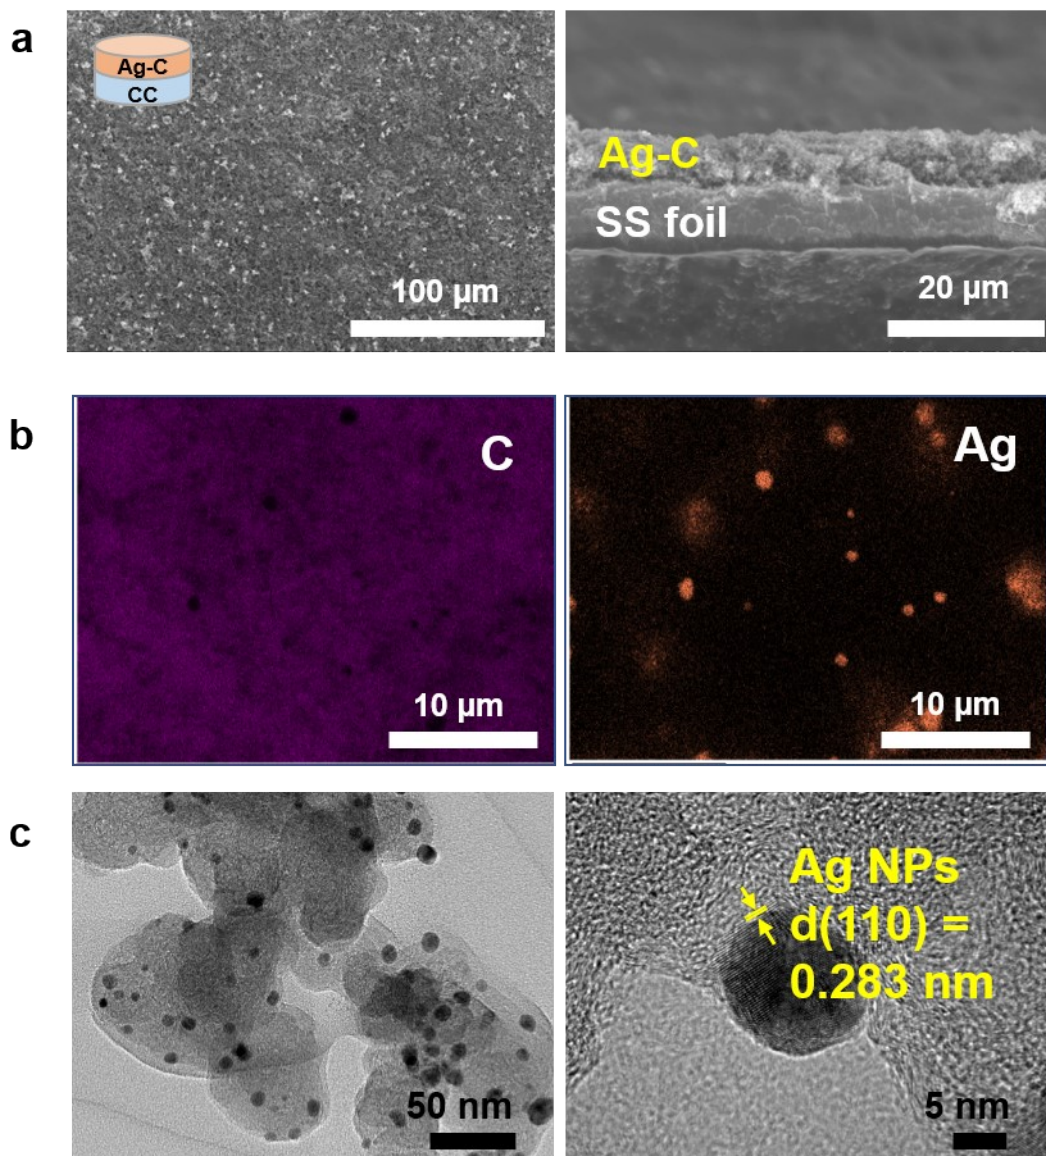

**Fig. S2.** Morphology and composition characterization of Ag-C layer. (a) Plane and cross-sectional view of SEM images, and (b) EDS mapping of Ag-C layer. (c) TEM image and HRTEM images of Ag-C composites.

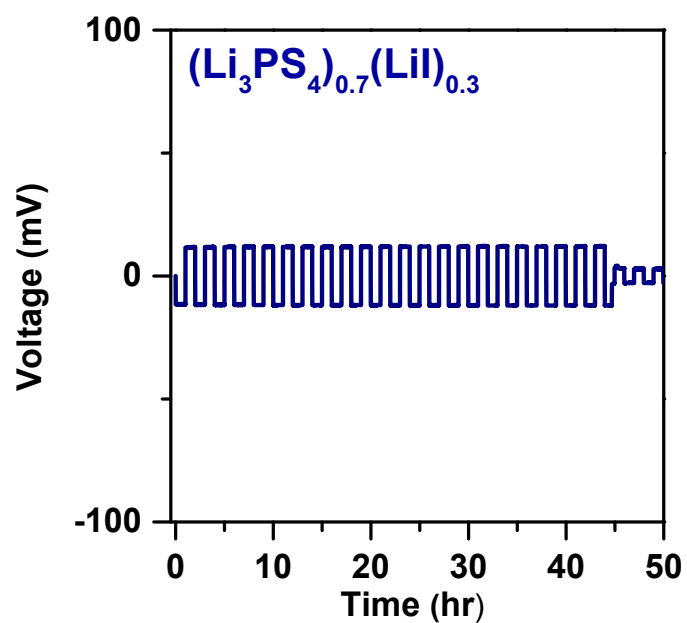

**Fig. S3.** Electrochemical performance of a symmetric cell  $(\text{Li}||(\text{Li}_3\text{PS}_4)_{0.7}(\text{LiI})_{0.3}||\text{Li})$ . Voltage-time profiles of the Li plating/stripping process in Li symmetric cell with  $(\text{Li}_3\text{PS}_4)_{0.7}(\text{LiI})_{0.3}$  SE at the current density of  $0.5 \text{ mAcm}^{-2}$ .



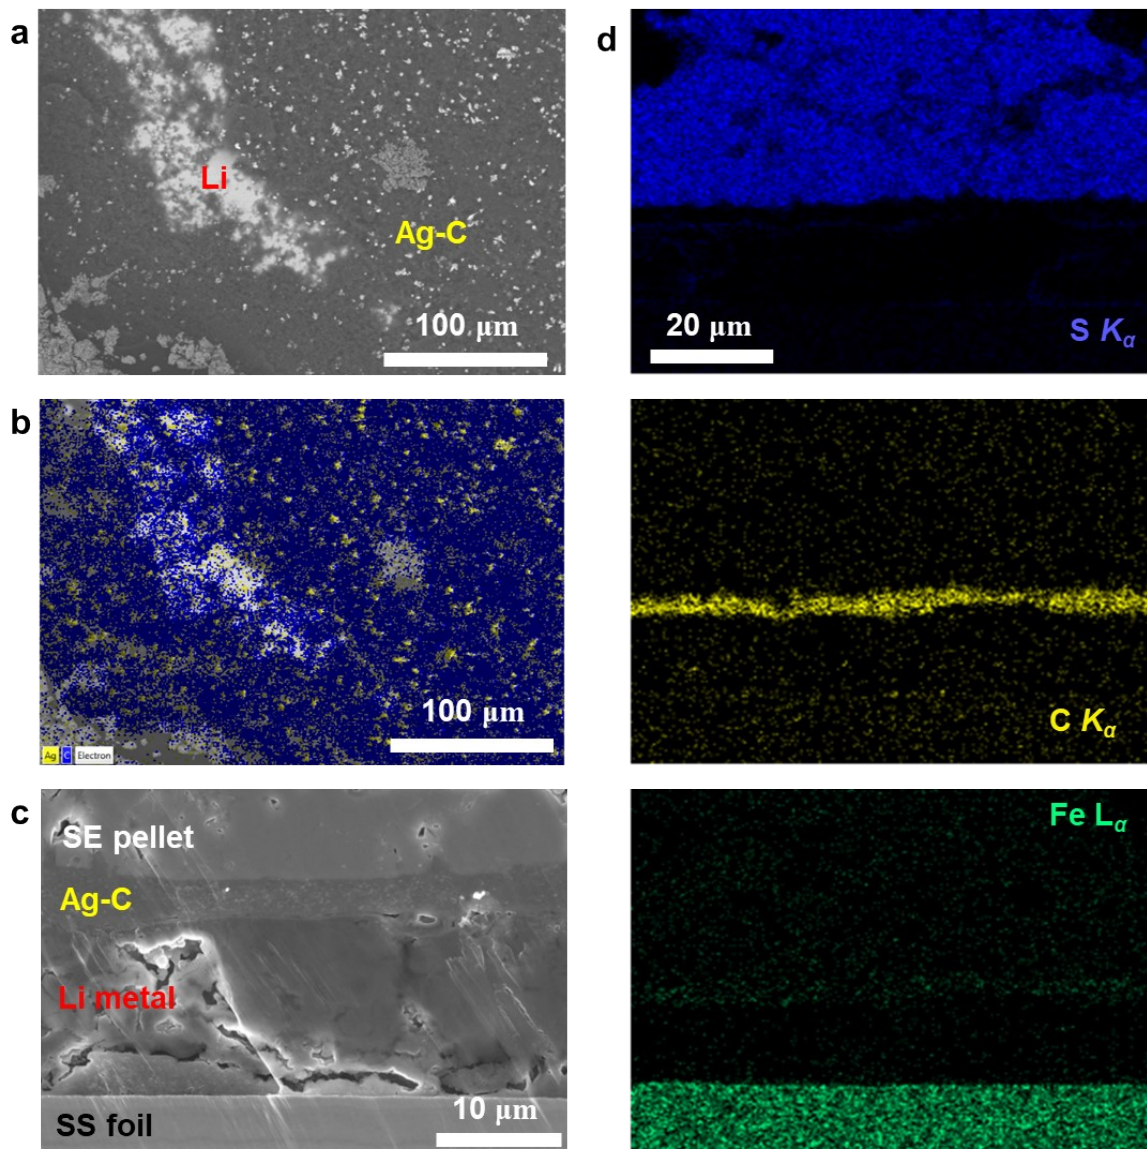

**Fig. S4** Planar (a) SEM and (b) EDS images of Li plating with Ag-C layer. Cross-sectional (c) SEM and (d) EDS images of SE/Ag-C/Li/SS interfaces in the NCM||Ag-C full cell using  $\text{Li}_{5.5}\text{PS}_{4.5}\text{Cl}_{1.5}$  solid electrolyte after charging at 0.1 C for 10 h.
